# Supplementary material for: The economic value of targeting aging
Source: PubMed Central journal article supplement (PMC10154220; doi:10.1038/s43587-021-00080-0), 2021-07-05
Supplement: 43587_2021_80_MOESM1_ESM.pdf [file 43587_2021_80_MOESM1_ESM.pdf]

**Supplementary information**

---

**The economic value of targeting aging**

---

In the format provided by the  
authors and unedited

Supplementary Table 1: Wolverine: Willingness to Pay (WTP) for reversing aging at age 65 (\$ thousand)

|                          | Age at which WTP calculated |       |       |       |       |
|--------------------------|-----------------------------|-------|-------|-------|-------|
|                          | 0                           | 20    | 40    | 60    | 80    |
| 1 <sup>st</sup> +1 year  | 103.5                       | 153.8 | 228.6 | 339.6 | 372.9 |
| 2 <sup>nd</sup> +1 year  | 103.0                       | 153.1 | 227.5 | 338.2 | 373.4 |
| 3 <sup>rd</sup> +1 year  | 102.5                       | 152.3 | 226.4 | 336.7 | 373.4 |
| 4 <sup>th</sup> +1 year  | 102.0                       | 151.5 | 225.2 | 335.1 | 373.0 |
| 5 <sup>th</sup> +1 year  | 101.4                       | 150.7 | 224.0 | 333.4 | 372.4 |
| 10 <sup>th</sup> +1 year | 98.2                        | 145.9 | 216.9 | 323.9 | 366.0 |
| 20 <sup>th</sup> +1 year | 90.1                        | 133.9 | 199.4 | 299.9 | 343.1 |
| 30 <sup>th</sup> +1 year | 80.7                        | 120.0 | 179.0 | 272.3 | 313.6 |

Notes: The rows show the Willingness to Pay (WTP) for a reversal of aging at 65 that leads to the 1<sup>st</sup>, 2<sup>nd</sup>, 3<sup>rd</sup>... 30<sup>th</sup> one-year increase in remaining life expectancy (LE) at ages 0, 20, 40, 60, 80. The LE remaining at these ages in the baseline simulation is 78.9, 59.0, 39.5, 21.7 and 8.4 years.

Supplementary Table 2: Willingness to pay (WTP) for metformin treatments and disease eradications (\$ thousand)

|                                       | Age at which WTP calculated |        |        |        |        |
|---------------------------------------|-----------------------------|--------|--------|--------|--------|
|                                       | 0                           | 20     | 40     | 60     | 80     |
| Metformin started at age 75           | 188.4                       | 281.4  | 429.2  | 697.7  | 1365.7 |
| Metformin started at age 65           | 365.9                       | 546.3  | 833.2  | 1354.6 | 1835.0 |
| Metformin started at age 50           | 712.5                       | 1064.0 | 1622.8 | 2204.1 | 2336.7 |
| Eradication of cancer                 | 361.8                       | 528.5  | 749.4  | 840.6  | 436.7  |
| Eradication of dementia               | 68.4                        | 102.0  | 155.6  | 247.2  | 397.1  |
| Eradication of cardiovascular disease | 439.7                       | 651.9  | 928.7  | 1139.3 | 1123.9 |

Notes: The life expectancy remaining at ages 0, 20, 40, 60, 80 when not taking metformin is 78.9, 59.0, 39.5, 21.7 and 8.4 years. At these ages when taking metformin, it is 82.7, 62.9, 43.3, 25.2 and 3.0 years.

Supplementary Table 3: Calibration

---

| Parameter  | Value          | Source                                               |
|------------|----------------|------------------------------------------------------|
| $1/\sigma$ | 1.5            | [34] Table 3                                         |
| $\eta$     | 1.509          | [34] Table 4                                         |
| $\phi$     | 0.224          | [34] Table 4                                         |
| $w(20)$    | 6.98           | VSL at birth \$11.5million [14]                      |
| $R$        | 65             | Retirement Age                                       |
| $\gamma$   | 1.35           | [36] Figure 1                                        |
| $\Psi(R)$  | 0.68           | [36] Table 1                                         |
| $\xi$      | 1.75           | [36] Figure 1                                        |
| $r = \rho$ | 0.02           | [8]                                                  |
| $M$        | 0.3319         | [39] Table 2 average across male and female          |
| $T$        | 97.6           | [39] Table 2 average across male and female          |
| $\beta$    | 0.0966         | Life Expectancy (LE) at birth 78.9 years             |
| $E$        | 0.0821         | [20] Table 3 average across male and female          |
| $B$        | $\exp(-0.504)$ | [20] Table 5                                         |
| $\alpha$   | 0.34           | [40],[41]                                            |
| $\mu$      | 0.0516         | Healthy Life Expectancy (HLE) at birth is 68.5 years |
| $z_0/z$    | 0.1            | [8]                                                  |

---
